# Supplementary material
Source: publisher figshare collection journal article supplement (https://karger.figshare.com/ndownloader/files/17937599)
Supplement: Supplementary file 1 [file 17937599]

**Supplemental Table 2: Mean LH, pulse frequency, and pulse amplitude in OVX + E mice**

| OVX | Mean LH (ng/mL) | Pulses/90 min | Amplitude (ng/mL) |
| --- | --- | --- | --- |
| 0 ng E | 4.46 ± 0.29AB | 3.83 ± 0.17A | 1.78 ± 0.27A |
| 20 ng E | 4.44 ± 0.13AB | 4.25 ± 0.48A | 2.78 ± 0.72AB |
| 40 ng E | 5.49 ± 0.33A | 5.00 ± 0.00A | 3.14 ± 0.28B |
| 100 ng E | 3.31 ± 0.31B | 2.82 ± 0.20B | 2.69 ± 0.13AB |

Values are mean ± SEM.

Values with unique superscripts are significantly different (p<0.05).
